# Supplementary material for: What Is the Value of and Who Values Native Bee Pollination for Wild Blueberries and Cranberries?
Source: Preprints.org preprint supplement (doi:10.20944/preprints201807.0027.v1), 2018-07-03
Supplement: Supplementary file 1 [file supplementary]

### Supplementary Materials

**Table S1** – Representative budget for 40 hectare Maine wild blueberry farm selling berries for frozen processing.

|                                     | Total            | Per<br>Hectare    | Per<br>Kilogram |
|-------------------------------------|------------------|-------------------|-----------------|
| Number of Hectares                  | 40               | -                 | -               |
| Wild Blueberry Yield (kg)           | 149,912          | 3,704             | -               |
| Price (\$/kg)                       | \$1.61           | -                 | -               |
| <b>Annual Revenue</b>               | <b>\$240,935</b> | <b>\$5,953.62</b> | <b>\$1.61</b>   |
| <b>Annual Operating Expenses</b>    |                  |                   |                 |
| Fertilizer                          |                  |                   |                 |
| Granular                            | \$7,954          | \$196.55          | \$0.05          |
| Other                               | \$0              | \$0               | \$0             |
| Chemicals                           |                  |                   |                 |
| Fungicides                          | \$1,650          | \$40.77           | \$0.011         |
| Herbicides (Pre-Merge)              | \$11,295         | \$279.10          | \$0.08          |
| Herbicides (Post-Merge)             | \$2,481          | \$61.31           | \$0.02          |
| Herbicides (Wiping)                 | \$154            | \$3.82            | \$0.001         |
| Insecticides                        | \$942            | \$23.27           | \$0.006         |
| Insect Traps                        | \$73             | \$1.81            | \$0.0005        |
| Pollination                         | \$41,680         | \$1,029.94        | \$0.28          |
| Sulfur & Other                      | \$1,192          | \$29.46           | \$0.008         |
| Labor                               | \$15,398         | \$380.48          | \$0.10          |
| Labor (Other Expenses)              | \$0              | \$0               | \$0             |
| Diesel Fuel and Oil (General)       | \$0              | \$0               | \$0             |
| Diesel Fuel and Oil (Itemized)      | \$4,981          | \$123.08          | \$0.03          |
| Burning for Pruning                 | \$7,000          | \$172.97          | \$0.05          |
| Heating                             | \$1,750          | \$43.24           | \$0.012         |
| Maintenance and Upkeep              | \$8,329          | \$205.82          | \$0.06          |
| Managed Pollinator                  | \$0              | \$0               | \$0             |
| Miscellaneous                       |                  |                   |                 |
| Containers                          | \$0              | \$0               | \$0             |
| Contracted Oil Delivery for Burning | \$0              | \$0               | \$0             |
| Custom Hire                         | \$0              | \$0               | \$0             |
| Fire Permit                         | \$20             | \$0.49            | \$0.0001        |
| Hauling & Trucking                  | \$0              | \$0               | \$0             |
| Install Drainage Tile               | \$0              | \$0               | \$0             |
| Packaging                           | \$0              | \$0               | \$0             |
| Rent or Lease (Electric Fence)      | \$2,000          | \$49.42           | \$0.013         |
| Rent or Lease (Land)                | \$0              | \$0               | \$0             |
| Replacement Teeth for Flail Mower   | \$167            | \$4.12            | \$0.001         |
| Shipping                            | \$0              | \$0               | \$0             |
| Storage & Warehousing               | \$0              | \$0               | \$0             |
| Supplies                            | \$500            | \$12.36           | \$0.003         |
| Soil & Tissue Testing               | \$0              | \$0               | \$0             |

|                                         |                  |                   |               |
|-----------------------------------------|------------------|-------------------|---------------|
| Tax for Wild Blueberries                | \$2,479          | \$61.25           | \$0.017       |
| Utilities                               | \$600            | \$14.83           | \$0.004       |
| Interest                                | \$963            | \$23.80           | \$0.006       |
| <b>Total Operating Expenses</b>         | <b>\$111,608</b> | <b>\$2,757.90</b> | <b>\$0.74</b> |
| <b>Total Overhead Expenses</b>          | <b>\$4,595</b>   | <b>\$113.54</b>   | <b>\$0.03</b> |
| <b>Annual Ownership Expenses</b>        |                  |                   |               |
| Depreciation and Interest               |                  |                   |               |
| Buildings & Structures                  | \$1,417          | \$35.01           | \$0.009       |
| Excavation Equipment                    | \$9,000          | \$222.39          | \$0.06        |
| Drainage Tiles                          | \$0              | \$0               | \$0           |
| Burning Equipment                       | \$540            | \$13.34           | \$0.004       |
| Mowing Equipment                        | \$1,200          | \$29.65           | \$0.008       |
| Fertilization Equipment                 | \$300            | \$7.41            | \$0.002       |
| IPM Equipment                           | \$0              | \$0               | \$0           |
| Spraying Equipment                      | \$1,867          | \$46.13           | \$0.012       |
| Wiping Equipment                        | \$353            | \$8.73            | \$0.002       |
| Irrigation                              | \$0              | \$0               | \$0           |
| Harvesting Equipment (Hand)             | \$0              | \$0               | \$0           |
| Harvesting Equipment (Mechanical)       | \$2,700          | \$66.72           | \$0.018       |
| Field Boxes                             | \$800            | \$19.77           | \$0.005       |
| Managed Pollinator                      | \$0              | \$0               | \$0           |
| Processing Equipment                    | \$0              | \$0               | \$0           |
| Tools                                   | \$1,360          | \$33.61           | \$0.009       |
| Tractors & Vehicles                     | \$11,369         | \$280.94          | \$0.08        |
| Land                                    | \$23,884         | \$590.19          | \$0.16        |
| Interest on Loans                       | \$791            | \$19.55           | \$0.005       |
| Insurance                               | \$4,576          | \$113.07          | \$0.03        |
| Taxes                                   | \$2,234          | \$55.20           | \$0.015       |
| <b>Total Ownership Expenses</b>         | <b>\$62,391</b>  | <b>\$1,541.71</b> | <b>\$0.42</b> |
| <b>Total Annual Cost</b>                | <b>\$178,594</b> | <b>\$4,413.15</b> | <b>\$1.19</b> |
| <b>Net Farm Income (NFI)</b>            | <b>\$62,341</b>  | <b>\$1,540.47</b> | <b>\$0.42</b> |
| <b>Return over Variable Cost (ROVC)</b> | <b>\$129,326</b> | <b>\$3,195.72</b> | <b>\$0.86</b> |
| <b>Performance Measures</b>             |                  |                   |               |
| <i>Breakeven Revenue</i>                |                  | \$/hectare        | \$/kg         |
| Long-run to Cover All Costs             |                  | \$4,413.15        | \$1.19        |
| Short-run to Cover Operating Costs      |                  | \$2,757.90        | \$0.74        |

---

**Table S2** – Representative budget for 40 hectare Massachusetts cranberry farm selling berries for processing.

|                                    | Total            | Per Hectare        | Per Kilogram  |
|------------------------------------|------------------|--------------------|---------------|
| Number of Hectares                 | 40               | -                  | -             |
| Cranberry Yield (kg)               | 606,847          | 14,996             | -             |
| Price (\$/kg)                      | \$0.93           | -                  | -             |
| <b>Annual Revenue</b>              | <b>\$566,404</b> | <b>\$13,996.14</b> | <b>\$0.93</b> |
| <b>Annual Operating Expenses</b>   |                  |                    |               |
| Fertilizer                         |                  |                    |               |
| Granular                           | \$9,643          | \$238.29           | \$0.016       |
| Soluble                            | \$0              | \$0                | \$0           |
| Liquid                             | \$0              | \$0                | \$0           |
| Other                              | \$0              | \$0                | \$0           |
| Chemicals                          |                  |                    |               |
| Fungicides                         | \$5,865          | \$144.93           | \$0.01        |
| Herbicides (Pre-Merge)             | \$10,305         | \$254.64           | \$0.02        |
| Herbicides (Post-Merge)            | \$3,062          | \$75.67            | \$0.005       |
| Herbicides (Wiping)                | \$1,632          | \$40.34            | \$0.003       |
| Insecticides                       | \$16,661         | \$411.69           | \$0.03        |
| Insect Traps                       | \$250            | \$6.18             | \$0.0004      |
| Pollination                        | \$15,724         | \$388.54           | \$0.03        |
| Plants (Runners)                   | \$22,206         | \$548.73           | \$0.04        |
| Sand                               | \$36,667         | \$906.05           | \$0.06        |
| Sulfur & Other                     | \$0              | \$0                | \$0           |
| Labor                              | \$24,732         | \$611.14           | \$0.04        |
| Labor (Other Expenses)             | \$0              | \$0                | \$0           |
| Diesel Fuel and Oil (General)      | \$0              | \$0                | \$0           |
| Diesel Fuel and Oil (Itemized)     | \$17,016         | \$420.47           | \$0.03        |
| Heating                            | \$5,000          | \$123.55           | \$0.01        |
| Maintenance and Upkeep             | \$31,400         | \$775.91           | \$0.05        |
| Managed Pollinator                 | \$0              | \$0                | \$0           |
| Miscellaneous                      |                  |                    |               |
| CCCGA Fee                          | \$2,709          | \$66.95            | \$0.004       |
| Cranberry Marketing Committee Tax  | \$3,612          | \$89.26            | \$0.006       |
| Containers                         | \$0              | \$0                | \$0           |
| Custom Hire                        | \$0              | \$0                | \$0           |
| Hauling & Trucking                 | \$0              | \$0                | \$0           |
| IPM & Other Crop Services          | \$0              | \$0                | \$0           |
| Miscellaneous                      | \$7,300          | \$180.39           | \$0.01        |
| Packaging                          | \$0              | \$0                | \$0.000       |
| Professional Services & Consulting | \$7,200          | \$177.92           | \$0.01        |
| Rent or Lease                      | \$0              | \$0                | \$0           |
| Sanding                            | \$0              | \$0                | \$0           |
| Shipping                           | \$0              | \$0                | \$0           |
| Storage & Warehousing              | \$0              | \$0                | \$0           |

|                                         |                  |                    |                |
|-----------------------------------------|------------------|--------------------|----------------|
| Supplies                                | \$0              | \$0                | \$0            |
| Soil & Tissue Testing                   | \$31             | \$0.76             | \$0.0001       |
| Utilities                               | \$600            | \$14.83            | \$0.001        |
| Interest                                | \$2,027          | \$50.10            | \$0.003        |
| <b>Total Operating Expenses</b>         | <b>\$223,642</b> | <b>\$5,526.32</b>  | <b>\$0.37</b>  |
| <b>Total Overhead Expenses</b>          | <b>\$4,495</b>   | <b>\$44.95</b>     | <b>\$0.003</b> |
| <b>Annual Ownership Expenses</b>        |                  |                    |                |
| Depreciation and Interest               |                  |                    |                |
| Buildings & Structures                  | \$2,583          | \$63.84            | \$0.004        |
| Bog Renovation & Drainage               | \$8,267          | \$204.27           | \$0.01         |
| Spraying Equipment                      | \$440            | \$10.87            | \$0.001        |
| Fertilization Equipment                 | \$1,224          | \$30.25            | \$0.002        |
| Irrigation                              | \$30,400         | \$751.20           | \$0.05         |
| Mowing & Brush Cutting Equipment        | \$40             | \$0.99             | \$0.000        |
| IPM Equipment                           | \$5              | \$0.11             | \$0.000        |
| Wiping Equipment                        | \$428            | \$10.58            | \$0.001        |
| Harvesting Equipment                    | \$7,180          | \$177.42           | \$0.01         |
| Sanding Equipment                       | \$1,680          | \$41.51            | \$0.003        |
| Water Catchment & Containment           | \$0              | \$0                | \$0            |
| Managed Pollinator                      | \$0              | \$0                | \$0            |
| Tools                                   | \$1,360          | \$33.61            | \$0.002        |
| Tractors & Vehicles                     | \$30,593         | \$755.98           | \$0.05         |
| Land                                    | \$154,047        | \$3,806.58         | \$0.25         |
| Interest on Loans                       | \$17,973         | \$444.11           | \$0.03         |
| Insurance                               | \$4,618          | \$114.11           | \$0.01         |
| Taxes                                   | \$1,069          | \$26.41            | \$0.002        |
| <b>Total Ownership Expenses</b>         | <b>\$261,906</b> | <b>\$6,471.85</b>  | <b>\$0.43</b>  |
| <b>Total Annual Cost</b>                | <b>\$490,044</b> | <b>\$12,043.12</b> | <b>\$0.80</b>  |
| <b>Net Farm Income (NFI)</b>            | <b>\$76,360</b>  | <b>\$1,953.02</b>  | <b>\$0.13</b>  |
| <b>Return over Variable Cost (ROVC)</b> | <b>\$342,761</b> | <b>\$8,469.82</b>  | <b>\$0.56</b>  |
| <b>Performance Measures</b>             |                  |                    |                |
| <i>Breakeven Revenue</i>                |                  | \$/hectare         | \$/kg          |
| Long-run to Cover All Costs             |                  | \$12,109.24        | \$0.81         |
| Short-run to Cover Operating Costs      |                  | \$5,526.32         | \$0.37         |

---
